# Supplementary material for: Development of Quantitative Rapid Isothermal Amplification Assay for Leishmania donovani
Source: MDPI journal article supplement (doi:10.3390/diagnostics11111963), 2021-10-22
Supplement: s1 [file s1]

### Supplementary Information

**Table S1.** Information of test samples used in E-phase threshold determination. Samples were classified based on range of Ct values (color-shaded).

| Sample ID | LD-qPCR Ct | E-phase duration in seconds<br>(approximate) |
|-----------|------------|----------------------------------------------|
| 1-041     | 30.825     | 615                                          |
| 1-042     | 30.915     | 605                                          |
| 1-021     | 31.07      | 545                                          |
| 1-012     | 31.28      | 550                                          |
| 1-016     | 31.57      | 550                                          |
| 1-017     | 31.98      | 555                                          |
| 1-007     | 32.28      | 595                                          |
| 1-029     | 33.4       | 595                                          |
| 1-038     | 33.76      | 565                                          |
| 1-034     | 33.85      | 545                                          |
| 1-027     | 33.97      | 565                                          |
| 1-035     | 34.15      | 595                                          |
| 1-044     | 34.16      | 565                                          |
| 1-006     | 34.31      | 565                                          |
| 1-048     | 34.35      | 595                                          |
| 1-026     | 34.43      | 575                                          |
| 1-047     | 34.48      | 545                                          |
| 1-030     | 34.55      | 605                                          |
| 1-025     | 34.61      | 550                                          |
| 1-010     | 34.9       | 535                                          |
| 1-004     | 35.05      | 525                                          |
| 1-050     | 35.05      | 565                                          |
| 1-008     | 35.4       | 535                                          |
| 1-013     | 35.65      | 530                                          |
| 1-009     | 35.73      | 545                                          |
| 1-039     | 36.83      | 535                                          |
| 1-005     | 36.94      | 450                                          |
| 1-015     | 37.05      | 565                                          |
| 1-020     | 37.38      | 470                                          |
| 1-033     | 38.92      | 525                                          |
| asy-01    | -          | 30                                           |
| asy-02    | -          | 50                                           |
| asy-03    | -          | 50                                           |
| asy-04    | -          | 80                                           |

|        |   |     |
|--------|---|-----|
| asy-05 | - | 60  |
| asy-06 | - | 30  |
| asy-07 | - | 40  |
| asy-08 | - | 130 |
| asy-09 | - | 100 |
| asy-10 | - | 70  |
| asy-11 | - | 60  |
| asy-12 | - | 40  |
| asy-13 | - | 100 |
| asy-14 | - | 210 |
| asy-15 | - | 200 |
| asy-16 | - | 80  |
| asy-17 | - | 130 |
| asy-18 | - | 60  |
| asy-19 | - | 90  |
| asy-20 | - | 80  |
| asy-21 | - | 40  |
| asy-22 | - | 130 |
| asy-23 | - | 200 |
| asy-24 | - | 90  |
| asy-25 | - | 100 |
| asy-26 | - | 60  |
| asy-27 | - | 50  |
| asy-28 | - | 40  |
| asy-29 | - | 60  |
| asy-30 | - | 80  |

**Table S2.** Test sample information and results obtained in LD-qPCR, Q-RPA and C-RPA assays. Samples were classified based on range of Ct values (color-shaded)

| Sample ID | Patient type/DNA source | LD-qPCR (Ct) | C-RPA Tt (seconds) | Q-RPA Tr (seconds) | Template load per reaction (Q-RPA) | Template load per reaction (LD-qPCR) | Repeated in E-phase cut-off step |
|-----------|-------------------------|--------------|--------------------|--------------------|------------------------------------|--------------------------------------|----------------------------------|
| pk-21     | PKDL/skin punch biopsy  | 25.77        | 318                | 268.1887           | 3574.2703                          | 1036.96                              | no                               |
| pk-31     | PKDL/skin punch biopsy  | 28.07        | 342                | 294.5439           | 1611.5587                          | 250.02                               | no                               |
| pk-30     | PKDL/skin punch biopsy  | 29.78        | 480                | 327.2975           | 395.5728                           | 68.14                                | no                               |
| pk-27     | PKDL/skin punch biopsy  | 29.82        | 318                | 346.2408           | 337.8079                           | 29.77                                | no                               |

|              |                        |       |       |          |          |       |     |
|--------------|------------------------|-------|-------|----------|----------|-------|-----|
| <b>pk-45</b> | PKDL/skin punch biopsy | 29.99 | 360   | 364.4911 | 194.5880 | 63.72 | no  |
| <b>1-041</b> | VL/peripheral blood    | 30.82 | 283.8 | 348.6775 | 57.0750  | 25.27 | yes |
| <b>1-042</b> | VL/peripheral blood    | 30.91 | 324   | 366.7608 | 32.5988  | 24.39 | yes |
| <b>1-021</b> | VL/peripheral blood    | 31.07 | 421.2 | 314.857  | 203.8787 | 37.49 | yes |
| <b>1-012</b> | VL/peripheral blood    | 31.28 | 363.6 | 381.092  | 50.0899  | 17.03 | yes |
| <b>1-031</b> | VL/peripheral blood    | 31.77 | 318   | 371.1655 | 38.8844  | 24.09 | no  |
| <b>1-017</b> | VL/peripheral blood    | 31.98 | 442.8 | 385.1767 | 104.1347 | 5.22  | yes |
| <b>pk-28</b> | PKDL/skin punch biopsy | 32.25 | 318   | 399.1968 | 68.1658  | 6.04  | no  |
| <b>pk-06</b> | PKDL/skin punch biopsy | 32.25 | 438   | 435.2529 | 5.3101   | 16.38 | no  |
| <b>1-007</b> | VL/peripheral blood    | 32.28 | 384   | 369.762  | 77.4059  | 16.21 | yes |
| <b>pk-19</b> | PKDL/skin punch biopsy | 33.02 | 342   | 426.5876 | 8.7242   | 9.9   | no  |
| <b>1-029</b> | VL/peripheral blood    | 33.4  | 400.8 | 403.8656 | 10.3298  | 8.6   | yes |
| <b>1-045</b> | VL/peripheral blood    | 33.45 | 702   | 402.7065 | 21.8346  | 3.95  | no  |
| <b>pk-22</b> | PKDL/skin punch biopsy | 33.73 | 402   | 452.9884 | 3.1023   | 3.4   | no  |
| <b>pk-25</b> | PKDL/skin punch biopsy | 33.83 | 318   | 381.6445 | 49.0379  | 1.45  | no  |
| <b>1-043</b> | VL/peripheral blood    | 34.35 | 378   | 426.6306 | 7.6025   | 2.2   | no  |
| <b>1-048</b> | VL/peripheral blood    | 34.35 | 429   | 386.2104 | 41.1489  | 2.02  | yes |
| <b>pk-04</b> | PKDL/skin punch biopsy | 34.74 | 378   | 413.2267 | 14.5758  | 3.36  | no  |
| <b>pk-41</b> | PKDL/skin punch biopsy | 34.76 | 360   | 428.5616 | 6.5038   | 1.25  | no  |
| <b>1-036</b> | VL/peripheral blood    | 35.2  | 582   | 370.9053 | 39.1833  | 2.74  | no  |
| <b>1-013</b> | VL/peripheral blood    | 35.65 | 460.8 | 461.2454 | 1.7468   | 0.94  | yes |
| <b>1-009</b> | VL/peripheral blood    | 35.73 | 426   | 408.594  | 12.9257  | 1.84  | yes |
| <b>pk-48</b> | PKDL/skin punch biopsy | 36.56 | 480   | 522.3393 | 1.6488   | 0.9   | no  |

|              |                        |       |       |          |        |      |     |
|--------------|------------------------|-------|-------|----------|--------|------|-----|
| <b>1-014</b> | VL/peripheral blood    | 36.71 | 318   | 537.8795 | 0.1627 | 0.28 | no  |
| <b>1-005</b> | VL/peripheral blood    | 36.94 | 528.6 | 467.486  | 2.2847 | 0.8  | yes |
| <b>1-015</b> | VL/peripheral blood    | 37.05 | 381   | 517.3065 | 0.3077 | 0.14 | yes |
| <b>1-023</b> | VL/peripheral blood    | 37.22 | 318   | 464.6856 | 2.0189 | 0.77 | no  |
| <b>1-020</b> | VL/peripheral blood    | 37.38 | 682.8 | 485.1867 | 5.0682 | 0.11 | yes |
| <b>pk-46</b> | PKDL/skin punch biopsy | 37.74 | 618   | 523.5132 | 0.3660 | 0.46 | no  |
| <b>pk-17</b> | PKDL/skin punch biopsy | 37.92 | 540   | 534.1365 | 1.1543 | 0.44 | no  |
| <b>pk-36</b> | PKDL/skin punch biopsy | 38.51 | 480   | 540.3335 | 0.2198 | 0.07 | no  |
| <b>pk-37</b> | PKDL/skin punch biopsy | 38.64 | 558   | 457.6744 | 2.6916 | 0.09 | no  |
| <b>1-022</b> | VL/peripheral blood    | 38.67 | 318   | 500.2418 | 0.5220 | 0.37 | no  |
